# Supplementary material
Source: PubMed Central journal article supplement (PMC2742809)
Supplement: supp_C109.022384_jbc.C109.022384-1.pdf [file supp_C109.022384_jbc.C109.022384-1.pdf]

## Supplemental Figures

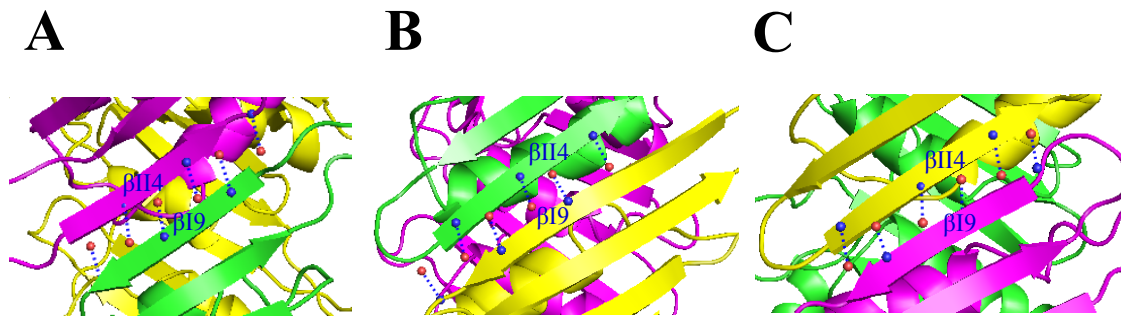

**Figure S1. The zipper-like series of hydrogen bonds between each two components of the human 9-1-1 complex.** hRad9 is shown in magenta, hHus1 in green, and hRad1 in yellow. The zipper-like series of hydrogen bonds is formed between  $\beta$ II4 of C-terminal domain of one molecule and  $\beta$ I9 of N-terminal domain of the next molecule.

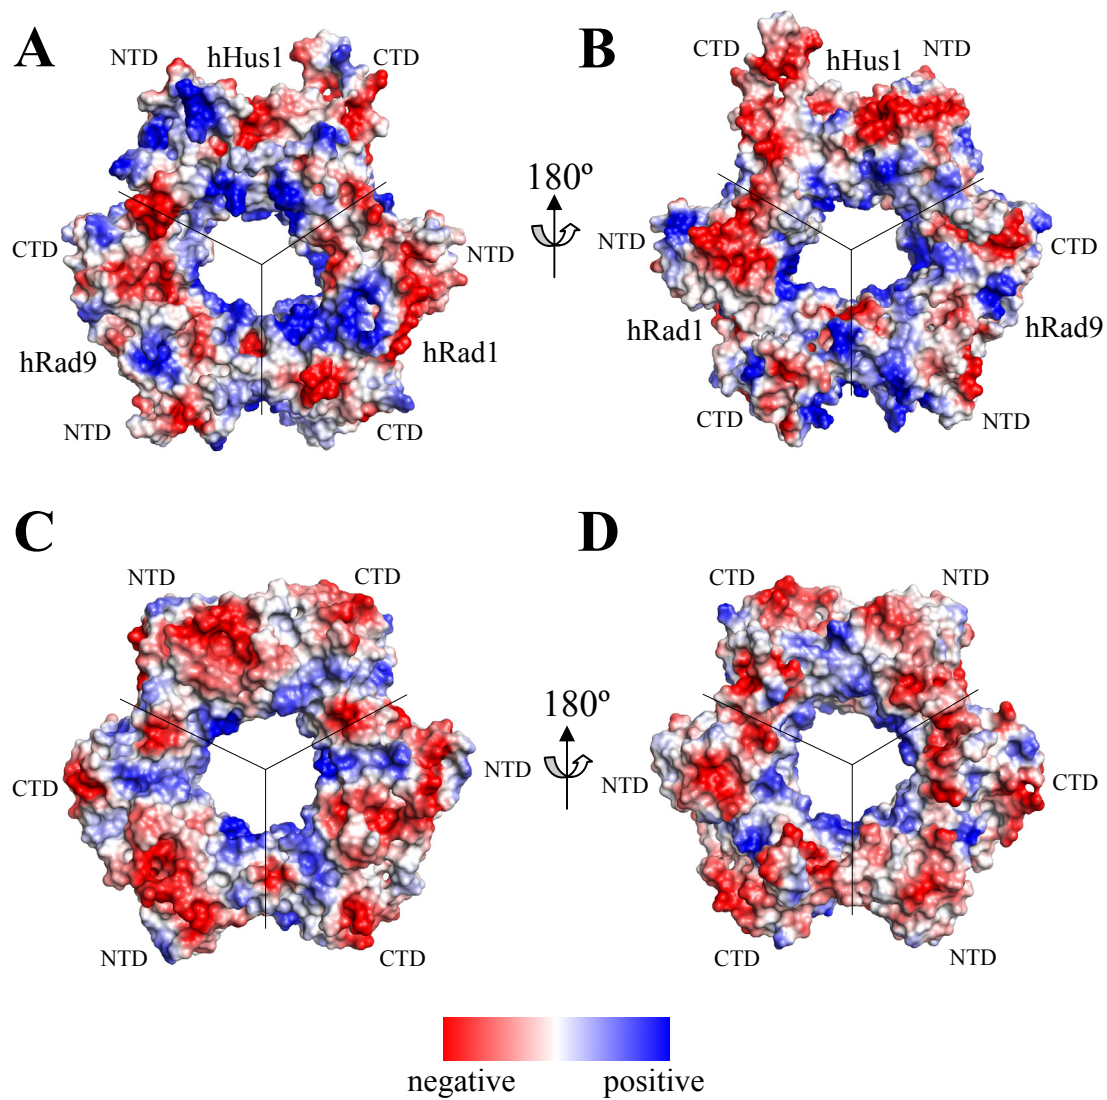

**Figure S2. The net charge distribution on the surface of the human 9-1-1 complex and PCNA. A, B,** The net charge distribution on the surface of the human 9-1-1 complex. **C, D,** The net charge distribution on the surface of the human PCNA (PDB code: 1vym).

**A**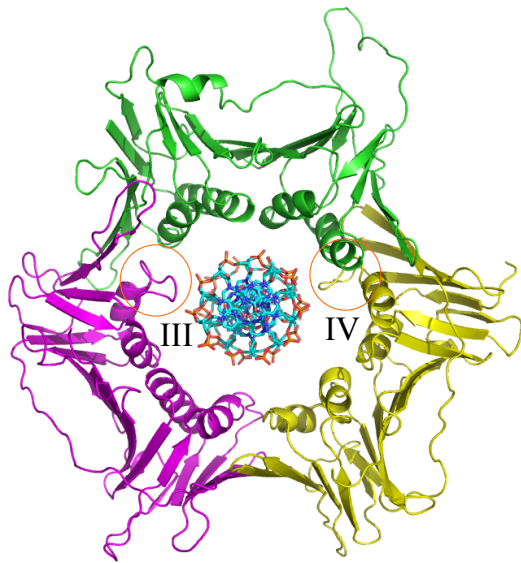**B**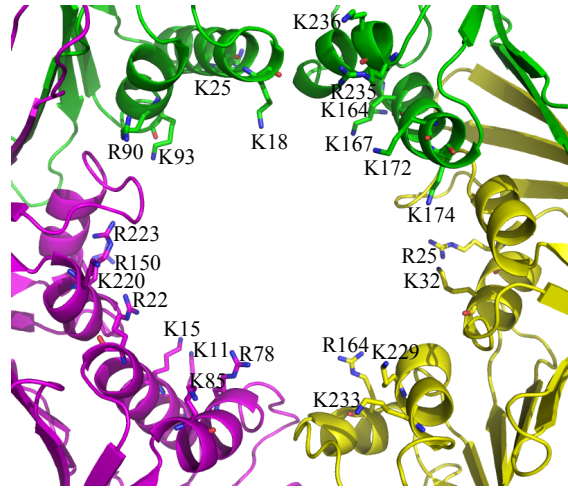

**Figure S3. Potential interactions between the human 9-1-1 complex and dsDNA.**

hRad9 is shown in magenta, hHus1 in green, and hRad1 in yellow. **A**, An interaction model of the 9-1-1 complex and duplex B-form DNA. III indicates the  $\alpha$ II1- $\beta$ II2 loop of hRad9 near the channel in the 9-1-1 complex; IV indicates the  $\alpha$ I2- $\beta$ I7 loop of hRad1 near the channel in the 9-1-1 complex. **B**, Lysine and arginine residues in the 12  $\alpha$  helices extend into the channel in the 9-1-1 ring.

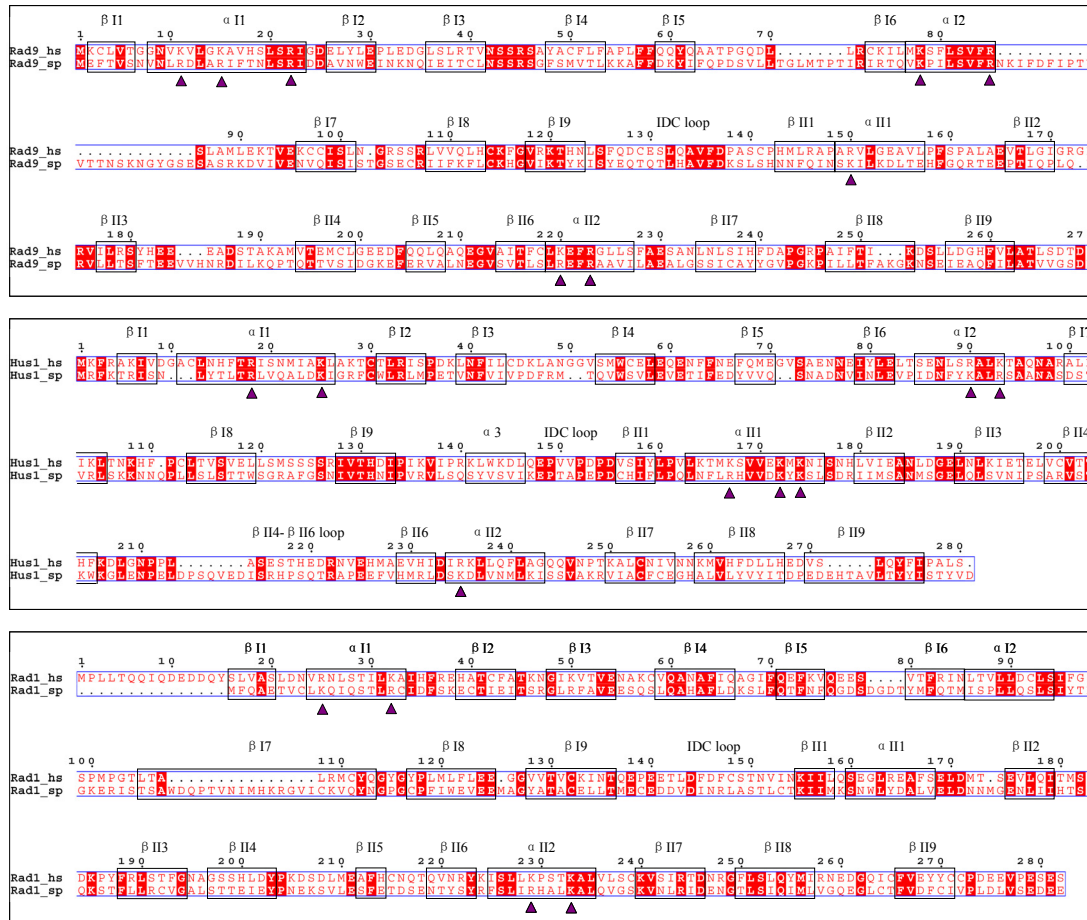

**Figure S4. Sequence alignments between human and fission yeast Rad9, Hus1, and Rad1.** Purple triangles indicate conserved lysine and arginine residues in the  $\alpha$  helices of these proteins which extend into the channel of the human 9-1-1 complex. Red shadow shows the conserved residues of each protein pair by sequence alignment from human and fission yeast sources. hs represents *human*, sp represents *Saccharomyces pombe*. The sequence alignments between *human* and *Saccharomyces pombe* sources were generated by ESPript (1).

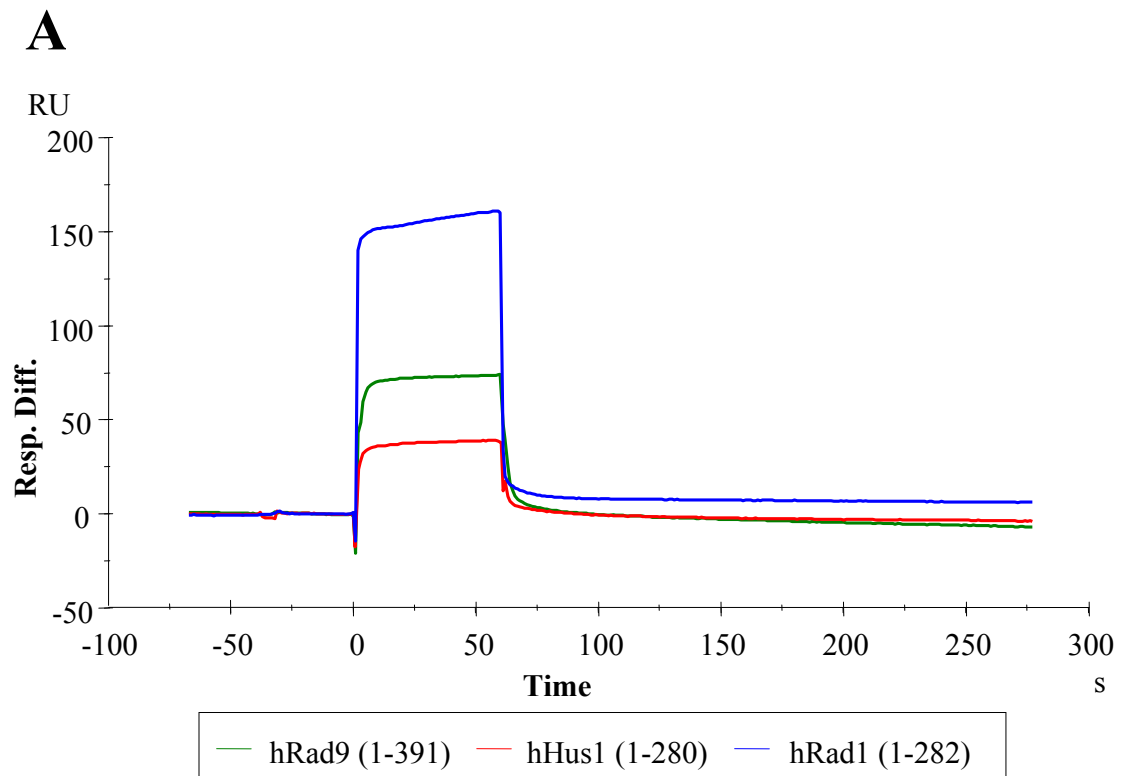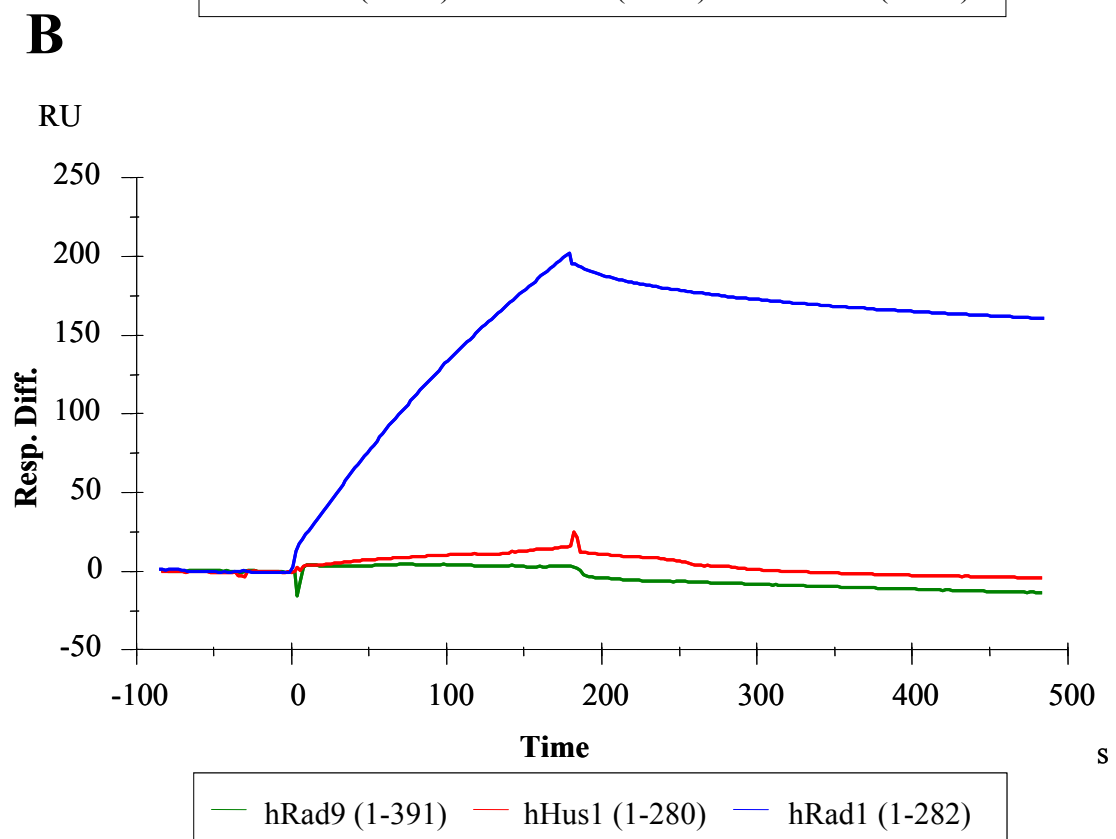

**Figure S5. Biacore analysis.** **A**, Biacore analysis of the hFen1 peptide (residues 335-364) binding to immobilized hRad9, hHus1, and hRad1. hRad1 has the highest binding affinity, hRad9 has the intermediate, and hHus1 has the lowest. **B**, Biacore

analysis of truncated hRad17 (residues 78-337) binding to immobilized hRad9, hHus1, and hRad1. Truncated hRad17 (residues 78-337) interacts with hRad1, but not with hHus1 or hRad9.

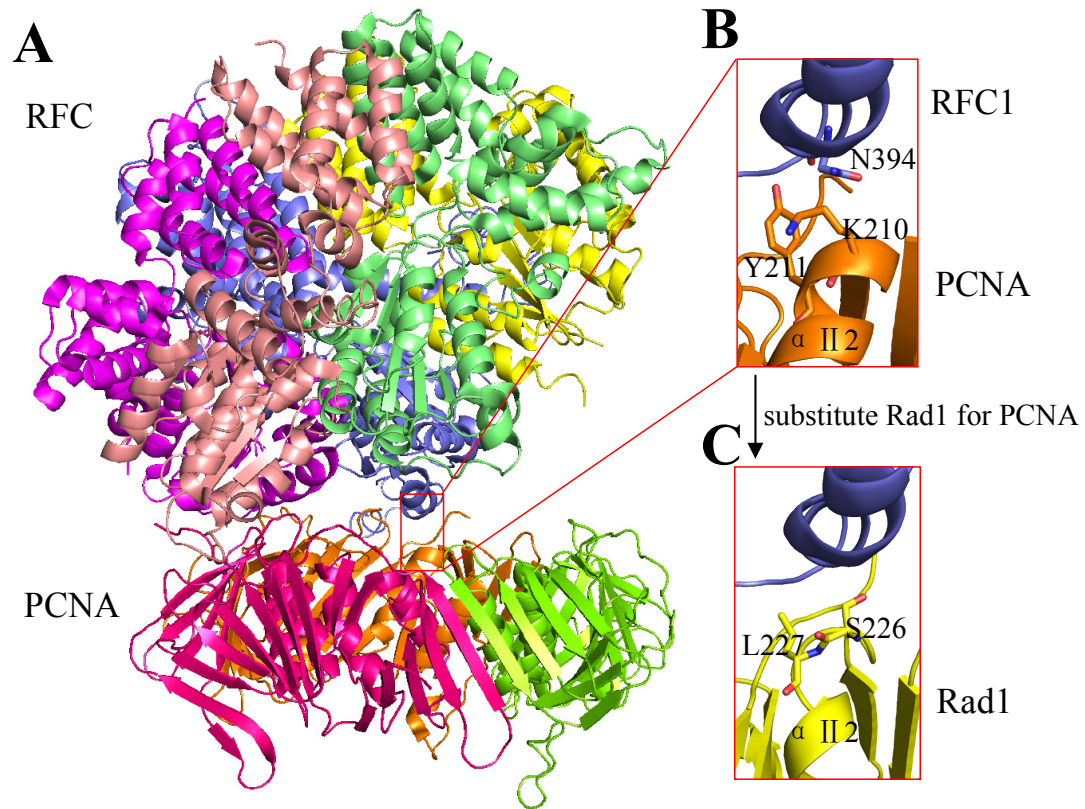

**Figure S6. *Saccharomyces cerevisiae* PCNA/RFC complex.** **A**, Stereoview of the *Saccharomyces cerevisiae* PCNA/RFC complex. PDB code: 1SXJ. **B**, The interface between RFC1 and the N-terminal residues of PCNA  $\alpha$ II2 helix. The interacting residues in the interface are indicated. **C**, Substitution of hRad1 for PCNA. The residues 226-227 in  $\alpha$ II2 helix of hRad1 corresponding to that of PCNA are indicated.

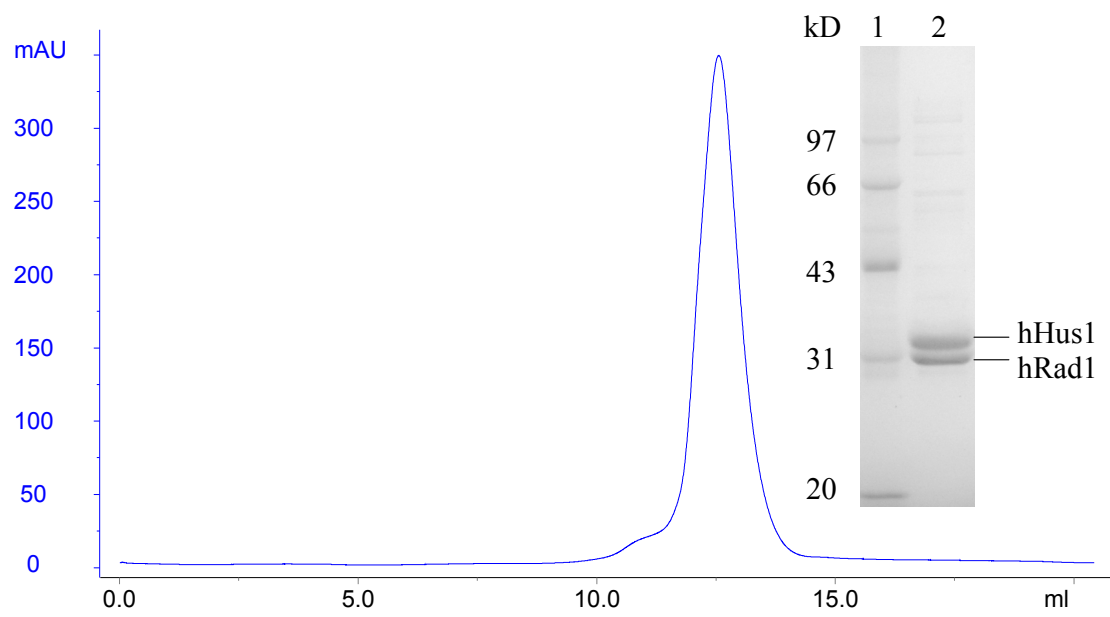

**Figure S7. Size-exclusion column chromatography and SDS-PAGE of human Hus1-Rad1 complex.** Line 1 shows the Protein markers. Line 2 shows the purified proteins obtained via size-exclusion column chromatography.



## Supplemental tables

**Table S1. Data Collection and Refinement Statistics**

|                                       | Native                                | Hg Derivative                         |
|---------------------------------------|---------------------------------------|---------------------------------------|
| <b>Data collection</b>                |                                       |                                       |
| X-ray source                          | BL41XU at Spring-8 (Japan)            | PX at SLS (Switzerland)               |
| Wavelength (Å)                        | 1.0716                                | 1.0063                                |
| Resolution (Å)                        | 15-3.2 (3.31-3.2)                     | 15-3.2 (3.31-3.2)                     |
| Space group                           | P2 <sub>1</sub>                       | P2 <sub>1</sub>                       |
| Unit cell (Å)                         | a=71.03, b=67.17, c=83.41,<br>β=97.58 | a=70.54, b=67.38, c=82.97,<br>β=97.85 |
| Unique reflections                    | 13,001(1272)                          | 12,762 (1879)                         |
| Average redundancy                    | 6.5                                   | 5.7                                   |
| Anomalous redundancy                  |                                       | 2.9                                   |
| I/σ (I)                               | 17.22(4.5)                            | 24.6 (4.1)                            |
| Completeness (%)                      | 99.8 (99.5)                           | 99 (100)                              |
| Anomalous Completeness (%)            |                                       | 98.2 (99.7)                           |
| R <sub>merge</sub> (%) <sup>a</sup>   | 8.0 (43.2)                            | 8.7 (29.0)                            |
| <b>Refinement</b>                     |                                       |                                       |
| Resolution (Å)                        | 15-3.2                                |                                       |
| R <sub>working</sub> (%) <sup>b</sup> | 28.9                                  |                                       |

|                         |       |
|-------------------------|-------|
| $R_{\text{free}}(\%)^c$ | 30.6  |
| Average B factor (Å)    | 67.8  |
| rmsd bounds (Å)         | 0.011 |
| rmsd angles (°)         | 1.728 |

Numbers in parentheses represent statistics for the highest resolution shell.

<sup>a</sup> $R_{\text{merge}} = \sum |I - \langle I \rangle| / \sum I$ , where  $I$  is the measured intensity for reflections with indices  $hkl$ .

<sup>b</sup> $R_{\text{working}} = \sum ||F_{\text{obs}}| - |F_{\text{calc}}|| / \sum |F_{\text{obs}}|$ .

<sup>c</sup> $R_{\text{free}}$  = R factor for a selected subset (10%) of the reflections that were not included in prior refinement calculations.

### Table S2. Interface parameters of the human 9-1-1 complex.

Calculated using the CCP4 PISA server (2) and the CCP4 SC program (3).

| Interface   | Complexation Significance Score (CSS)* | Shape Complementarity (SC)** |
|-------------|----------------------------------------|------------------------------|
| hRad9-hHus1 | 1.0                                    | 0.609                        |
| hHus1-hRad1 | 1.0                                    | 0.649                        |
| hRad1-hRad9 | 0.24                                   | 0.540                        |

\* Complexation Significance Score (CSS) ranges from 0 to 1 as the interface relevant to complexation increases.

\*\* Shape Complementarity (SC) is in the range 0–1 (1 = best fit).

## Supplemental References

1. Gouet, P., Courcelle, E., Stuart, D. I., and Metoz, F. (1999) *Bioinformatics* **15**, 305-308
2. Krissinel, E., and Henrick, K. (2007) *J. Mol. Biol.* **372**, 774-797
3. Lawrence, M. C., and Colman, P. M. (1993) *J. Mol. Biol.* **234**, 946-950
